# Supplementary material for: Understanding the stabilization effect of the hydrous IrOx layer formed on the iridium oxide surface during the oxygen evolution reaction in acid
Source: Royal Society of Chemistry journal article supplement (doi:10.1039/d2qi02214a), 2022-11-26
Supplement: d2qi02214a1.pdf [file d2qi02214a1.pdf]

Supplemental Information

**Understanding the Stabilization Effect of the Hydrrous IrO<sub>x</sub>  
Layer formed on Iridium Oxide Surface during the Oxygen  
Evolution Reaction in Acid**

Jun Qi,<sup>a</sup> Muzhi Yang,<sup>b</sup> Huiyan Zeng,<sup>a</sup> Yabin Jiang,<sup>a</sup> Long Gu,<sup>a</sup> Wenguang Zhao,<sup>c</sup> Zhongfei Liu,<sup>a</sup> Tianhui Liu,<sup>d</sup> Chunzhen Yang<sup>\*a,d</sup>, Rui Si<sup>\*a,d</sup>

<sup>a</sup>School of Materials, Sun Yat-Sen University, Shenzhen, 518107, P. R. China

<sup>b</sup>Sun Yat-Sen University Instrumental Analysis & Research Center, Guangzhou, 510275, P. R. China

<sup>c</sup>Peking University ShenZhen Graduate School, Shenzhen, 518107, P. R. China

<sup>d</sup>Synchrotron Radiation Facility Division, Institute of Advanced Science Facilities (IASF), Shenzhen, 518108, P. R. China

\*Correspondence to: [yangchzh6@mail.sysu.edu.cn](mailto:yangchzh6@mail.sysu.edu.cn); [sirui@mail.sysu.edu.cn](mailto:sirui@mail.sysu.edu.cn)

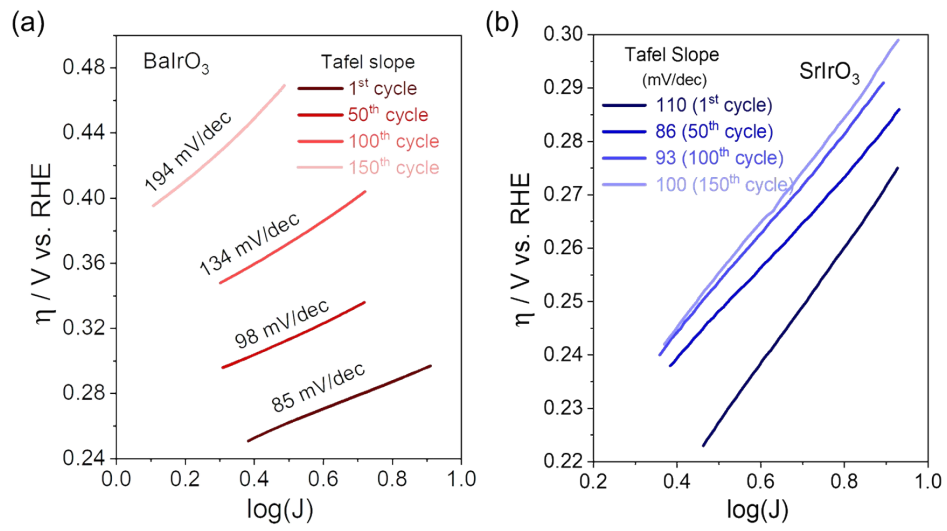

Figure S1 Evolution of Tafel curves of BaIrO<sub>3</sub> (a) and SrIrO<sub>3</sub> (b) after certain number of electrochemical cycling.

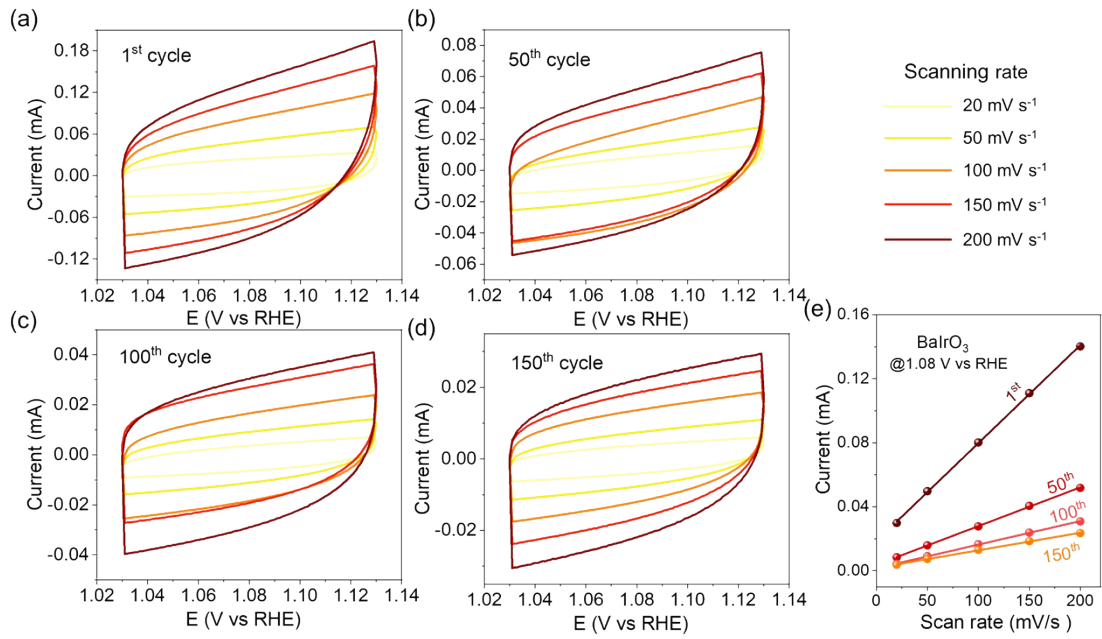

Figure S2 Cyclic voltammograms and charging currents for DL capacitance measurements in BaIrO<sub>3</sub>. The electric double-layer capacitance was calculated by fitting the curve of charging current (at 1.08 V vs RHE) and scan rate.

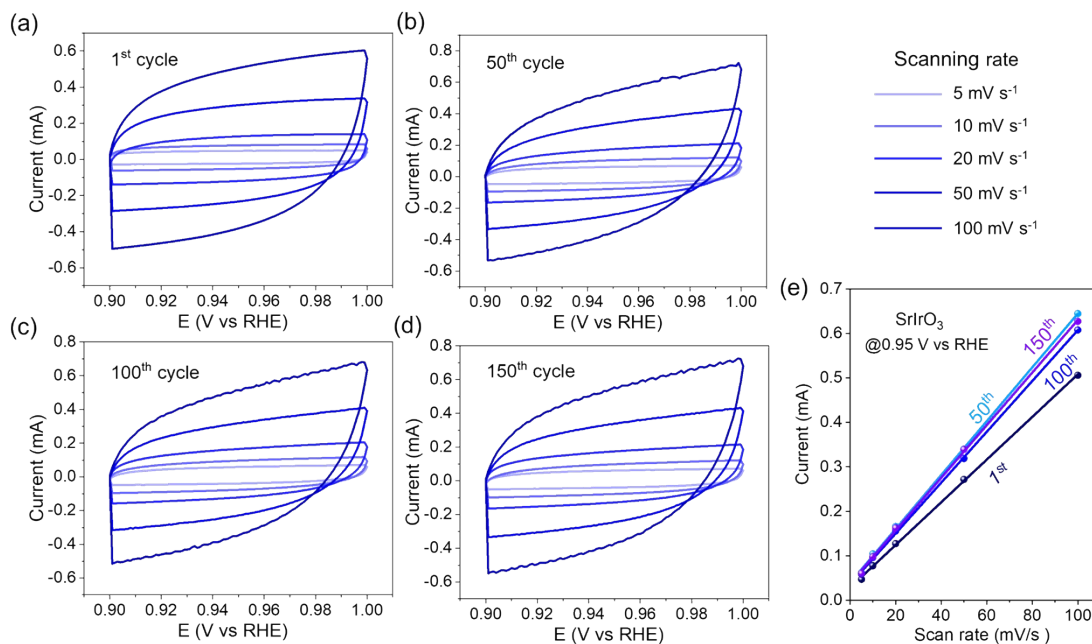

Figure S3. Cyclic voltammograms and charging currents for DL capacitance measurements in SrIrO<sub>3</sub>. The electric double-layer capacitance was calculated by fitting the curve of charging current (at 0.95V vs RHE) and scan rate.

The electric double-layer capacitance ( $C_{dl}$ ) was calculated from the scan-rate dependent CVs in non-Faradaic potential region with various scan rates.<sup>1</sup> The  $C_{dl}$  was calculated according to the equation  $i_c = \nu C_{dl}$ , where  $C_{dl}$  is the double-layer capacitance (mF),  $\nu$  is the scan rate (mV s<sup>-1</sup>),  $i_c$  is charging current (mA). Thus, a plot of  $i_c$  as a function of  $\nu$  yields a straight line with a slope equal to  $C_{dl}$ .

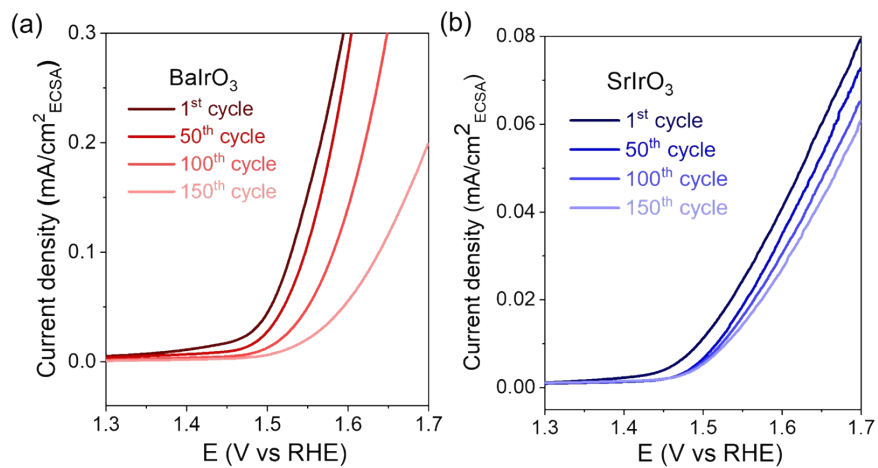

Figure S4. CV profiles of 1<sup>st</sup>, 50<sup>th</sup>, 100<sup>th</sup>, 150<sup>th</sup> cycle for BaIrO<sub>3</sub> and SrIrO<sub>3</sub> with currents normalized by the ECSA.

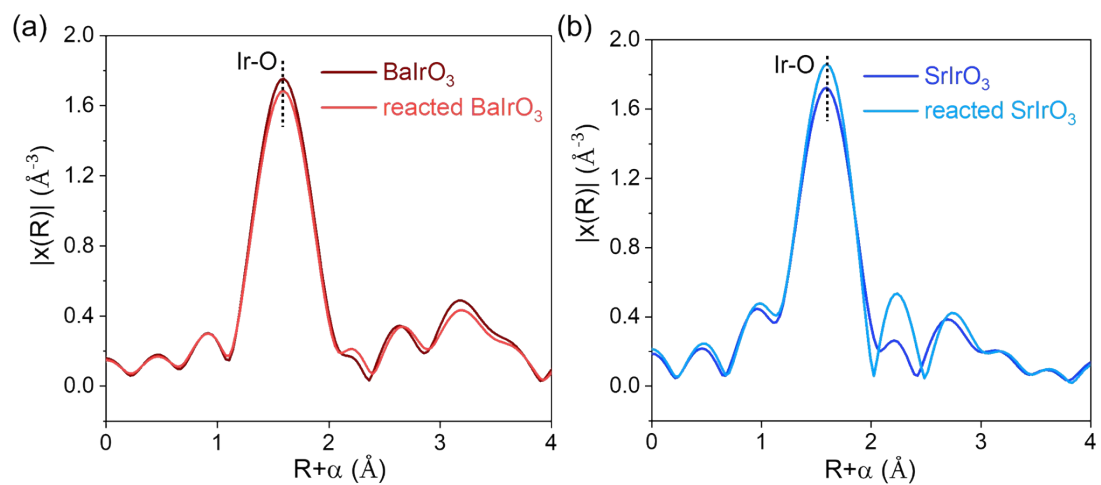

Figure S5. Comparison of the Ir  $L_{\text{III}}$ -edge EXAFS curves for the pristine and reacted  $\text{BaIrO}_3$  (a) and  $\text{SrIrO}_3$  (b) with a  $k$  range of  $3 \leq k \leq 10 \text{ \AA}^{-1}$ . These data are  $k^2$ -weighted and not phase-corrected.

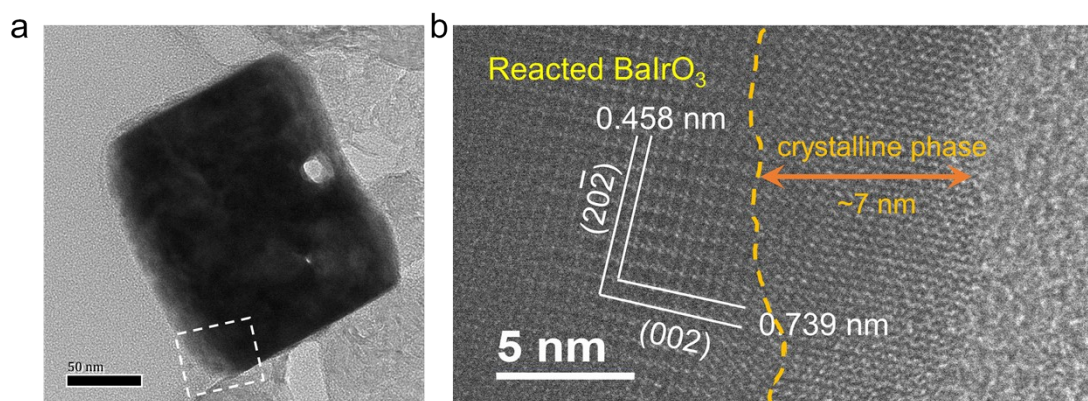

Figure S6. TEM images of reacted BaIrO<sub>3</sub>. (a) A typical oxide particle after electrochemical cycling, (b) high-resolution TEM image showing the crystalline structure at the exposed region.

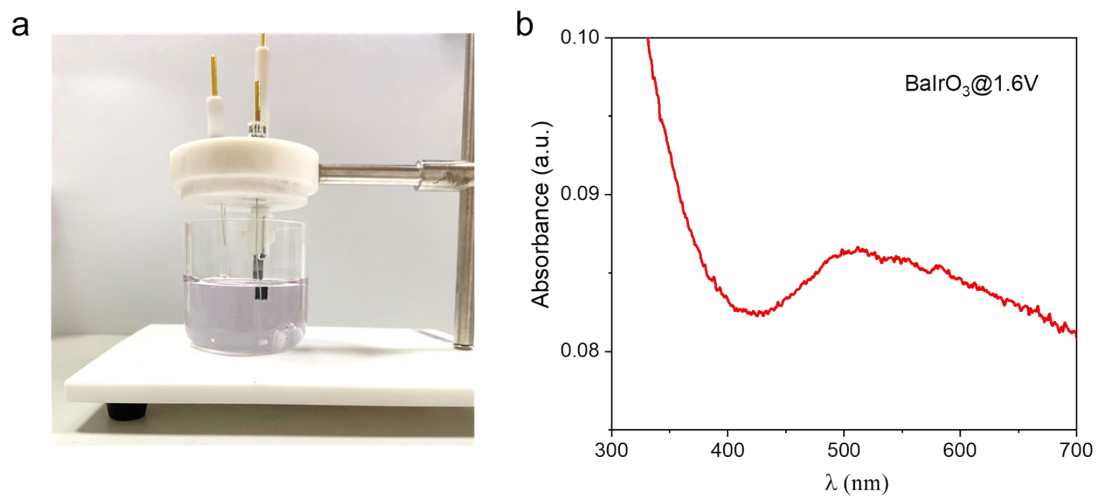

Figure S7. (a) Reaction setup of BaIrO<sub>3</sub> catalyst after holding at 1.6 V vs. RHE for 12 hours, (b) corresponding UV-Vis spectrum of the reacted H<sub>2</sub>SO<sub>4</sub> electrolyte.



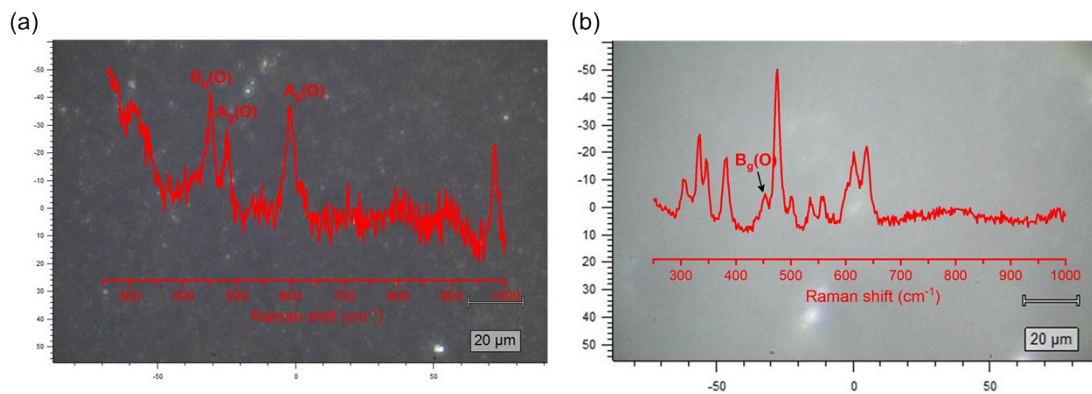

Figure S8. The optical photos of the initial (a) and reacted BaIrO<sub>3</sub> (b) after holding at 1.7 V vs RHE taken from the *operando* Raman experiments. Insets are the corresponding Raman spectra.

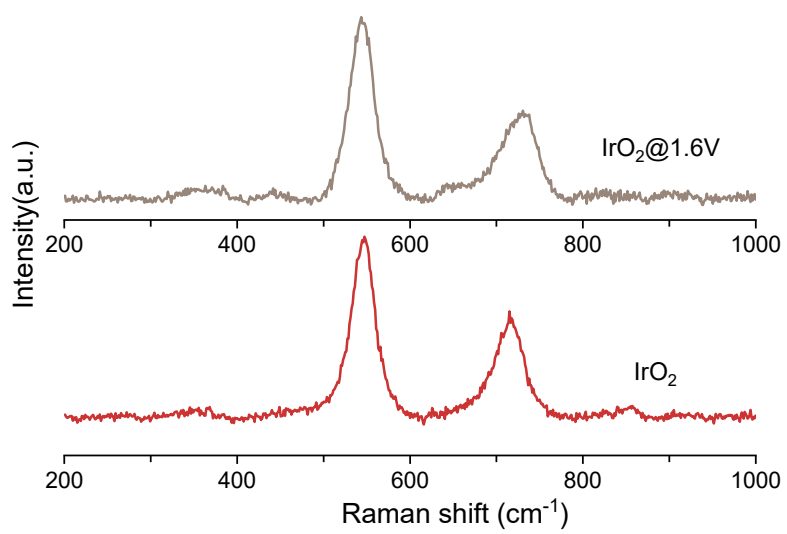

Figure S9. The Raman spectra of pristine and reacted IrO<sub>2</sub> after holding at 1.6 V vs RHE for 12h.

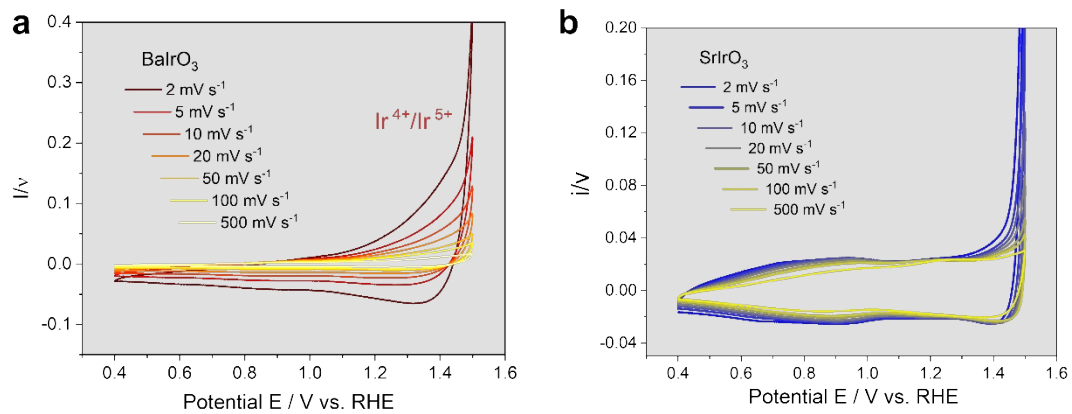

Figure S10. Cyclic voltammograms of  $\text{BaIrO}_3$  and  $\text{SrIrO}_3$  at different scan rates in  $0.5 \text{ M H}_2\text{SO}_4$ .

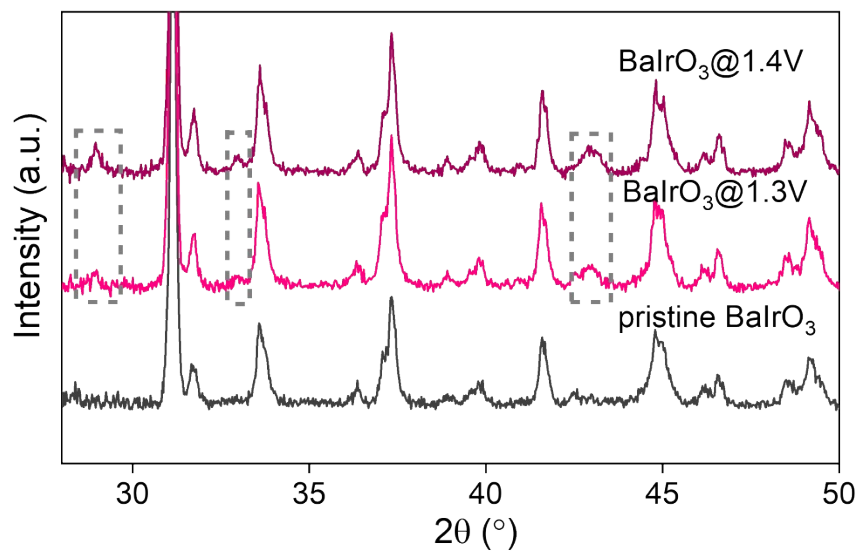

Figure S11 Evolution of XRD patterns of pristine BaIrO<sub>3</sub> and reacted BaIrO<sub>3</sub> after holding at 1.3 and 1.4 V vs. RHE in 0.5 M H<sub>2</sub>SO<sub>4</sub> solution for 12 hours.

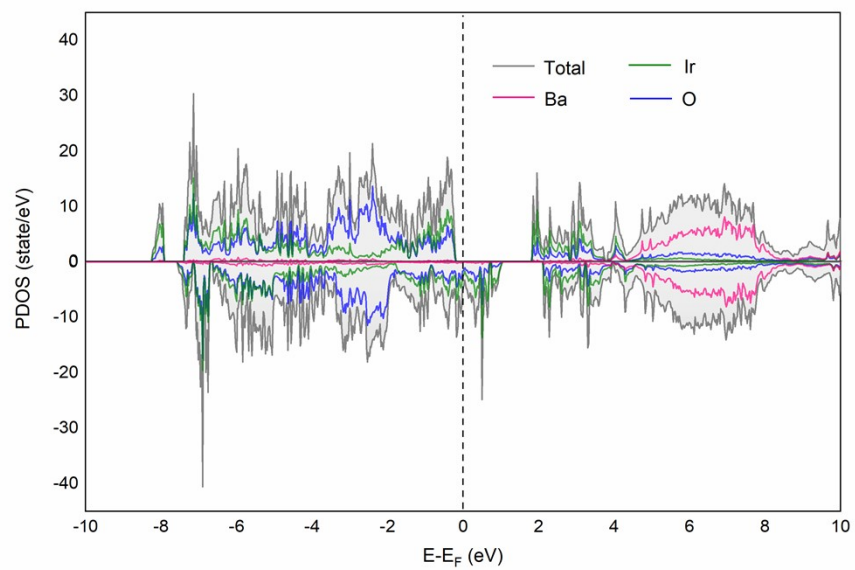

Figure S12. PDOS of BaIrO<sub>3</sub> as calculated by DFT in which the Fermi level is 0 eV.

**Table 1.** The parameters from the Rietveld refinement of BaIrO<sub>3</sub> and SrIrO<sub>3</sub>.

| Compound           | Space group | a (Å)  | b (Å) | c (Å)  | $\alpha$ (°) | $\beta$ (°) | $\gamma$ (°) | V <sub>unit-cell</sub> (Å <sup>3</sup> ) | R <sub>p</sub> | R <sub>wp</sub> |
|--------------------|-------------|--------|-------|--------|--------------|-------------|--------------|------------------------------------------|----------------|-----------------|
| BaIrO <sub>3</sub> | C 1 2/m 1   | 10.011 | 5.763 | 15.135 | 90           | 103.18      | 90           | 850.15                                   | 7.9            | 10.1            |
| SrIrO <sub>3</sub> | C 1 2/c 1   | 5.620  | 9.620 | 14.169 | 90           | 93.21       | 90           | 762.73                                   | 6.2            | 8.0             |

## Reference

- [1] McCrory, C. C.; Jung, S.; Peters, J. C.; Jaramillo, T. F., Benchmarking heterogeneous electrocatalysts for the oxygen evolution reaction. *J Am Chem Soc* **2013**, *135* (45), 16977-16987.
